# Supplementary material
Source: PubMed Central journal article supplement (PMC8434976)
Supplement: NIHMS1708647-supplement-1.pdf [file NIHMS1708647-supplement-1.pdf]

# Digital Supplement: Effects of neighborhood-level data on performance equality in predicting 30-day heart failure readmissions at an urban academic medical center

Gary E. Weissman, MD, MSHP, Stephanie Teeple, Nwamaka D. Eneanya, MD, MPH, Rebecca A. Hubbard, PhD, Shreya Kangovi, MD, MSHP

March 3, 2021

## Supplemental Methods

### Algorithmic Equity

We chose to focus on three measures of algorithmic equity that are both easily measurable and have clear policy remedies.<sup>1-3</sup> First, we examined error due to statistical bias in the predictions. Statistical bias, distinct from human bias, reflects the degree to which, on average, a model's predictions diverge from the true values. Biased models can improve with the collection of additional variables that are informatively associated with the outcome of interest or with the use of a more flexible modeling approach. To measure bias we compared the point estimates of the Brier score between white and non-white patients. Additionally, we iteratively resampled the data with an increasing number of randomly sampled input variables and measured the models' performance on the testing data in aggregate and by patient race.

Second, we examined the error due to variance. This type of error reflects how flexibly the model can generalize to a new dataset (e.g. the testing data) after being fitted with the training dataset. Models that have interpreted random noise in the training data as true signals will not generalize well to new datasets and will be overfit. Error due to variance can be improved with increased regularization or with the collection of more training observations. To measure error due to variance, we iteratively resampled from the training data increasing numbers of observations to train each model and then measured the models' performance using the testing data in aggregate and by patient race.

Third, we examined the classification parity, measured by differences in the positive predictive value, over a range of classification thresholds. In a fair model, these rates should be equivalent across patient sub-groups. This metric of equity is intended to gauge a model that supports deployment of resources for individual patients and does not require that outcome prevalence be the same across subgroups, although this could be an alternative measure of fairness. In predictive model development the classification threshold is often chosen by default, or chosen to maximize a performance metric with little attention to algorithmic equity. Classification parity might be improved in models by increasing the overall model performance in a particular group or by adjusting the classification threshold. Therefore, we examined the positive predictive value in aggregate and by patient race over all possible classification thresholds in the testing sample.

## Supplemental Tables

ICD codes to identify congestive heart failure admissions follow the approach of Amarasingham et al.<sup>4</sup>

*Table 1: Diagnostic codes for congestive heart failure.*

### ICD9 Codes

402.01

402.11

402.91

425.1

425.4

425.5

425.7

425.8

425.9

428.0

428.1

428.2

428.21

428.22

428.23

428.3

428.31

428.32

428.33

428.4

428.41

428.42

428.43

428.9

ICD codes for depression are taken from Fiest et al.<sup>5</sup>

*Table 2: Diagnostic codes for depression.*

### ICD9    ICD10

296.20    F32.0

296.21    F32.1

296.22    F32.2

|        |       |
|--------|-------|
| 296.23 | F32.3 |
| 296.24 | F32.4 |
| 296.25 | F32.5 |
| 296.30 | F32.6 |
| 296.31 | F32.7 |
| 296.32 | F32.8 |
| 296.33 | F32.9 |
| 296.34 | F33.0 |
| 296.35 | F33.1 |
| 300.4  | F33.2 |
| 311    | F33.3 |
| 296.5  | F33.8 |
| 296.6  | F33.9 |
| 296.82 | F34.1 |
| 296.90 | F41.2 |
| 309.0  | F31.3 |
| 309.1  | F31.4 |
| 309.28 | F31.5 |
|        | F31.6 |
|        | F34.8 |
|        | F34.9 |
|        | F38.0 |
|        | F38.1 |
|        | F38.8 |
|        | F39   |
|        | F99   |

*Table 3: Tuning Grid - Elastic Net*

| alpha | lambda |
|-------|--------|
| 1e-05 | 0.001  |
| 1e-04 | 0.003  |
| 1e-03 | 0.005  |
| 1e-02 | 0.010  |

|       |        |
|-------|--------|
| 5e-02 | 0.015  |
| 8e-02 | 0.020  |
| 1e-01 | 0.025  |
| 2e-01 | 0.030  |
| 3e-01 | 0.040  |
| 5e-01 | 0.050  |
| 6e-01 | 0.100  |
| 7e-01 | 0.150  |
| 8e-01 | 0.200  |
| 9e-01 | 0.300  |
| 1e+00 | 0.400  |
| 1e-05 | 0.500  |
| 1e-04 | 0.700  |
| 1e-03 | 0.800  |
| 1e-02 | 0.900  |
| 5e-02 | 1.000  |
| 8e-02 | 1.500  |
| 1e-01 | 2.000  |
| 2e-01 | 3.000  |
| 3e-01 | 4.000  |
| 5e-01 | 5.000  |
| 6e-01 | 6.000  |
| 7e-01 | 7.000  |
| 8e-01 | 8.000  |
| 9e-01 | 9.000  |
| 1e+00 | 10.000 |

*Table 4: Tuning Grid - Gradient Boosting Machine*

| <u>n.trees</u> | <u>interaction.depth</u> | <u>shrinkage</u> | <u>n.minobsinnode</u> |
|----------------|--------------------------|------------------|-----------------------|
| 5              | 1                        | 0.0001           | 1                     |
| 10             | 2                        | 0.0010           | 2                     |
| 15             | 3                        | 0.0050           | 3                     |
| 20             | 5                        | 0.0080           | 4                     |
| 25             | 7                        | 0.0100           | 5                     |
| 50             | 10                       | 0.0200           | 6                     |

|     |        |    |
|-----|--------|----|
| 75  | 0.0250 | 7  |
| 100 | 0.0300 | 8  |
|     | 0.0400 | 9  |
|     | 0.0500 | 10 |
|     | 0.0600 | 11 |
|     | 0.0800 | 12 |
|     | 0.1000 | 13 |
|     | 0.2000 |    |
|     | 0.3000 |    |
|     | 0.4000 |    |
|     | 0.5000 |    |
|     | 0.6000 |    |
|     | 0.7000 |    |
|     | 0.8000 |    |

*Table 5: Differences in model performance with inclusion of the Area Deprivation Index with bootstrapped 95% confidence intervals. Positive values indicate an increase in the metric (thus indicating worse performance in this case). Abbreviations: EN = elastic net, GBM = gradient boosting machine, BS = Brier score, CI = confidence interval.*

| Model type | Metric | Difference | 2.5% CI    | 95% CI    | p-value   |
|------------|--------|------------|------------|-----------|-----------|
| EN         | BS     | 4.06e-05   | -0.0003749 | 0.0002553 | 0.7943206 |
| GBM        | BS     | 3.84e-04   | -0.0025067 | 0.0015735 | 0.7155284 |

*Table 6: Summary of performance characteristics for models across all models in the held-out test set with bootstrapped confidence intervals. Abbreviations: EN = elastic net, GBM = gradient boosting machine.*

| Model type | ADI | Patient group | Brier score (95% confidence interval) | C-statistic (95% confidence interval) |
|------------|-----|---------------|---------------------------------------|---------------------------------------|
| EN         | No  | Non-white     | 0.13 (0.13 to 0.14)                   | 0.60 (0.54 to 0.66)                   |
| EN         | No  | White         | 0.12 (0.12 to 0.13)                   | 0.64 (0.58 to 0.72)                   |
| GBM        | No  | Non-white     | 0.14 (0.11 to 0.16)                   | 0.50 (0.44 to 0.56)                   |

|     |     |           |                     |                     |
|-----|-----|-----------|---------------------|---------------------|
| GBM | No  | White     | 0.13 (0.10 to 0.16) | 0.45 (0.34 to 0.56) |
| EN  | Yes | Non-white | 0.13 (0.13 to 0.14) | 0.61 (0.56 to 0.66) |
| EN  | Yes | White     | 0.12 (0.12 to 0.13) | 0.64 (0.57 to 0.71) |
| GBM | Yes | Non-white | 0.14 (0.12 to 0.16) | 0.40 (0.34 to 0.46) |
| GBM | Yes | White     | 0.12 (0.09 to 0.16) | 0.42 (0.31 to 0.53) |
| EN  | No  | All       | 0.13 (0.13 to 0.14) | 0.60 (0.55 to 0.65) |
| EN  | Yes | All       | 0.13 (0.13 to 0.14) | 0.60 (0.55 to 0.65) |
| GBM | No  | All       | 0.13 (0.11 to 0.16) | 0.48 (0.42 to 0.54) |
| GBM | Yes | All       | 0.13 (0.11 to 0.15) | 0.40 (0.34 to 0.46) |

Table 7: Missingness of predictor variables overall and by race..

| var_name   | overall_m  | overall_m  | nonwhite_m     | nonwhite_  | white_miss  | white_miss  |
|------------|------------|------------|----------------|------------|-------------|-------------|
| s          | issing_pct | issing_cnt | issingness_cnt | missing_pc | ingness_cnt | ingness_pct |
| worst_pco  | 0.946043   | 1578       | 0.9598394      | 1195       | 0.9054374   | 383         |
| 2_24h      | 2          |            |                |            |             |             |
| worst_cpk  | 0.932254   | 1555       | 0.9236948      | 1150       | 0.9574468   | 405         |
| _24h       | 2          |            |                |            |             |             |
| worst_alb  | 0.594124   | 991        | 0.6080321      | 757        | 0.5531915   | 234         |
| umin_24h   | 7          |            |                |            |             |             |
| worst_bili | 0.486211   | 811        | 0.4931727      | 614        | 0.4657210   | 197         |
| _24h       | 0          |            |                |            |             |             |
| worst_tro  | 0.403477   | 673        | 0.4248996      | 529        | 0.3404255   | 144         |
| ponin_24   | 2          |            |                |            |             |             |
| h          |            |            |                |            |             |             |
| worst_pro  | 0.368105   | 614        | 0.3919679      | 488        | 0.2978723   | 126         |
| bnp_24h    | 5          |            |                |            |             |             |
| worst_inr  | 0.366906   | 612        | 0.3847390      | 479        | 0.3144208   | 133         |
| _24h       | 5          |            |                |            |             |             |
| worst_te   | 0.155275   | 259        | 0.1485944      | 185        | 0.1749409   | 74          |
| mp_24h     | 8          |            |                |            |             |             |
| worst_sbp  | 0.152278   | 254        | 0.1445783      | 180        | 0.1749409   | 74          |
| _24h       | 2          |            |                |            |             |             |
| worst_wb   | 0.048561   | 81         | 0.0514056      | 64         | 0.0401891   | 17          |
| c_24h      | 2          |            |                |            |             |             |
| worst_bu   | 0.023980   | 40         | 0.0240964      | 30         | 0.0236407   | 10          |
| n_24h      | 8          |            |                |            |             |             |
| worst_cre  | 0.022182   | 37         | 0.0232932      | 29         | 0.0189125   | 8           |
| at_24h     | 3          |            |                |            |             |             |

|                    |               |    |           |    |           |   |
|--------------------|---------------|----|-----------|----|-----------|---|
| worst_na_24h       | 0.020983<br>2 | 35 | 0.0216867 | 27 | 0.0189125 | 8 |
| worst_glu_cose_24h | 0.014388<br>5 | 24 | 0.0136546 | 17 | 0.0165485 | 7 |
| is_hispanic        | 0.001798<br>6 | 3  | 0.0024096 | 3  | 0.0000000 | 0 |
| age                | 0.000000<br>0 | 0  | 0.0000000 | 0  | 0.0000000 | 0 |
| any_cocaine_6mos   | 0.000000<br>0 | 0  | 0.0000000 | 0  | 0.0000000 | 0 |
| any_deprilas6m     | 0.000000<br>0 | 0  | 0.0000000 | 0  | 0.0000000 | 0 |
| any_thc_6mos       | 0.000000<br>0 | 0  | 0.0000000 | 0  | 0.0000000 | 0 |
| count_er6m         | 0.000000<br>0 | 0  | 0.0000000 | 0  | 0.0000000 | 0 |
| count_h6m          | 0.000000<br>0 | 0  | 0.0000000 | 0  | 0.0000000 | 0 |
| count_op6m         | 0.000000<br>0 | 0  | 0.0000000 | 0  | 0.0000000 | 0 |
| gender             | 0.000000<br>0 | 0  | 0.0000000 | 0  | 0.0000000 | 0 |
| has_medicaid       | 0.000000<br>0 | 0  | 0.0000000 | 0  | 0.0000000 | 0 |
| is_white           | 0.000000<br>0 | 0  | 0.0000000 | 0  | 0.0000000 | 0 |

*Table 8: Model performance (Brier score) using an anti-classification approach that removes race entirely from the model and still uses the Area Deprivation Index (ADI) in its place. EN = elastic net, GBM = gradient boosting machine.*

| Model type | Patient group | Brier Score (95% confidence interval) |
|------------|---------------|---------------------------------------|
| EN         | All           | 0.13 (0.13 to 0.14)                   |
| GBM        | All           | 0.13 (0.11 to 0.16)                   |
| EN         | White         | 0.12 (0.12 to 0.13)                   |
| GBM        | White         | 0.13 (0.10 to 0.15)                   |
| EN         | Non-white     | 0.13 (0.13 to 0.14)                   |
| GBM        | Non-white     | 0.14 (0.11 to 0.16)                   |

Supplemental Figures

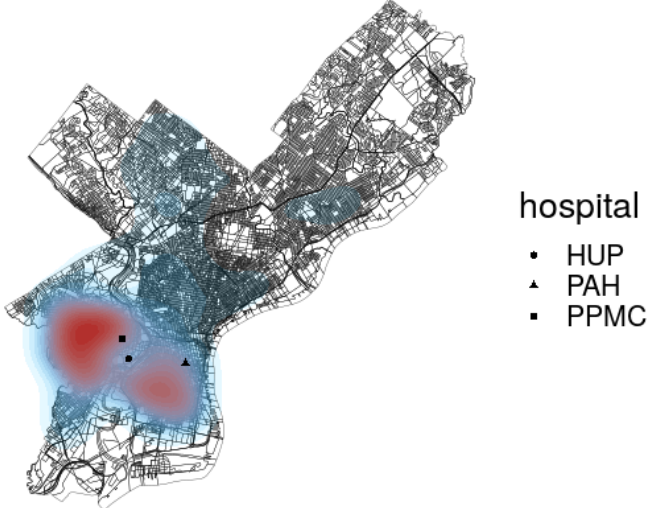

Figure 1: Density plot of patient addresses around Philadelphia with Hospital Locations



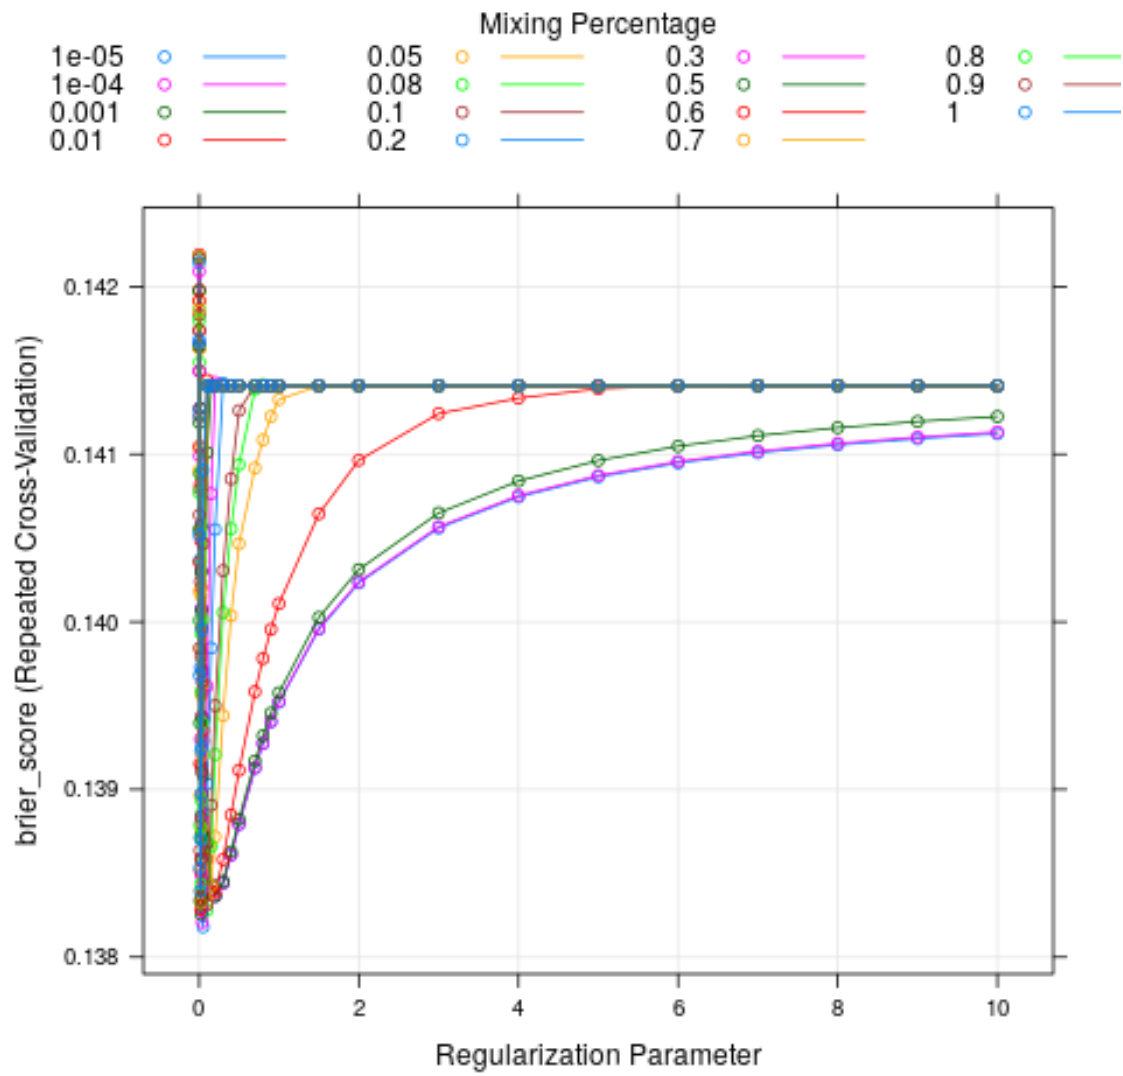

Figure 2: Results of grid search EN with baseline data

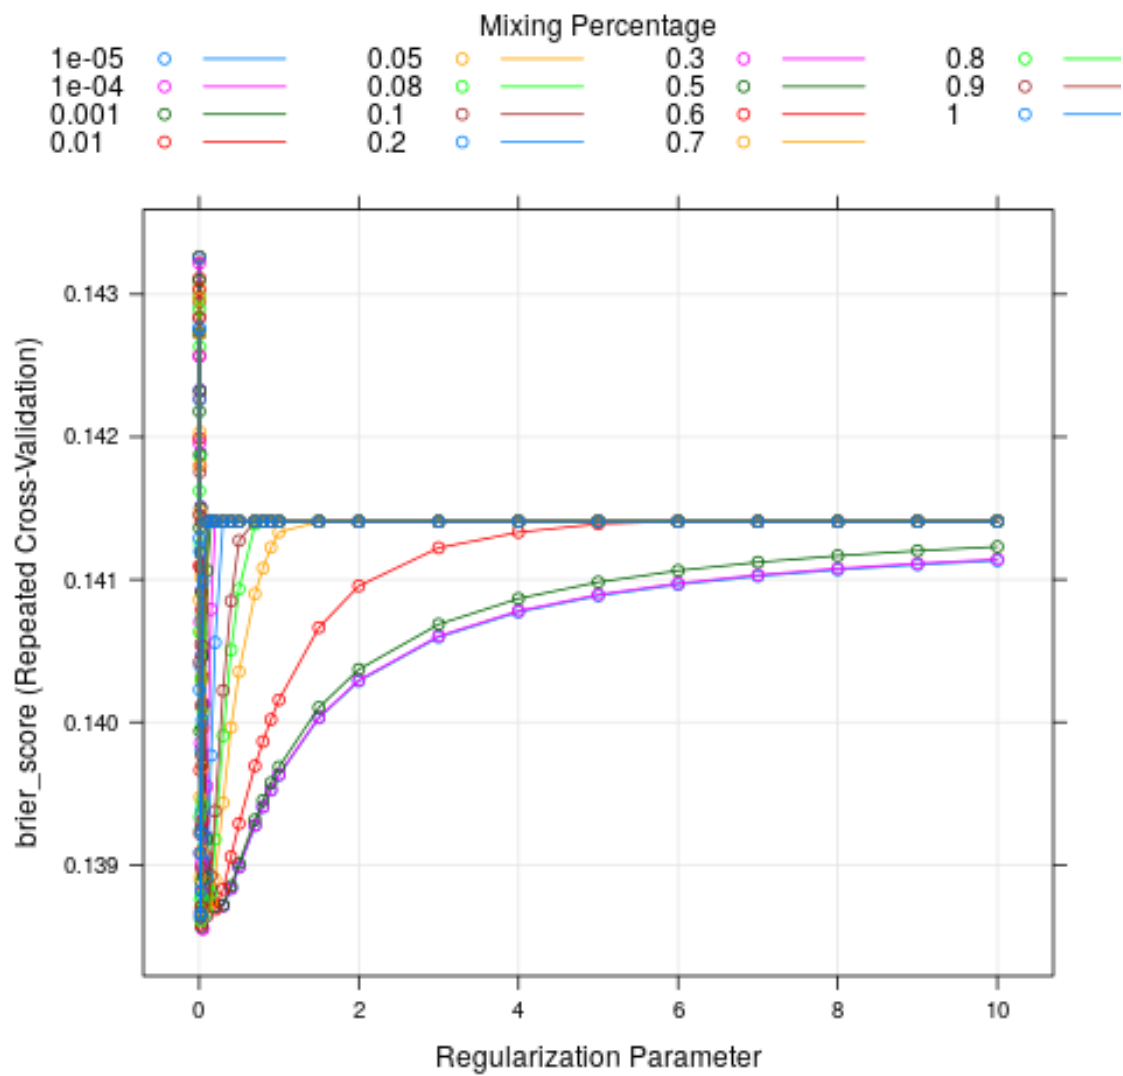

Figure 3: Results of grid search EN with inclusion of ADI data

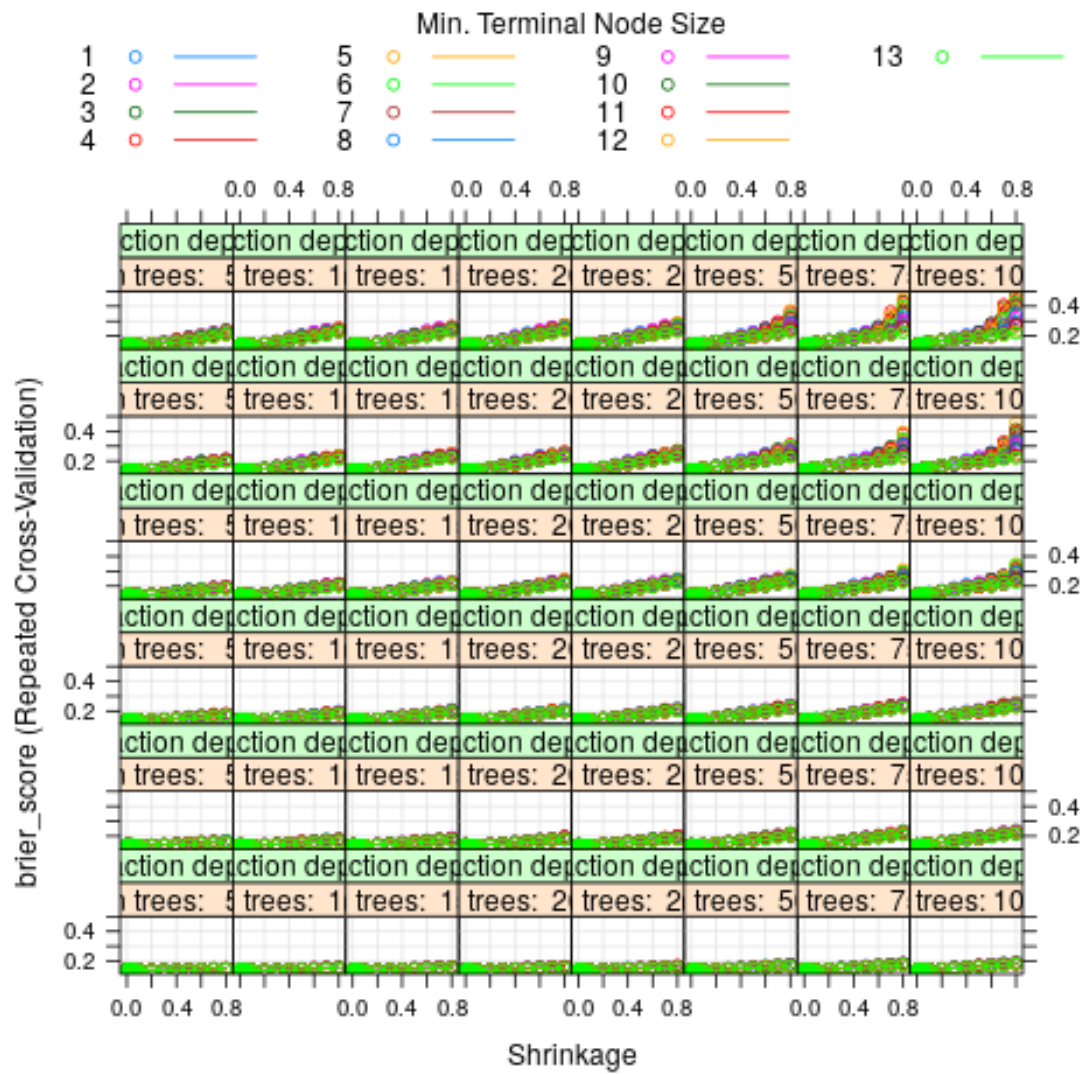

Figure 4: Results of grid search GBM with baseline data

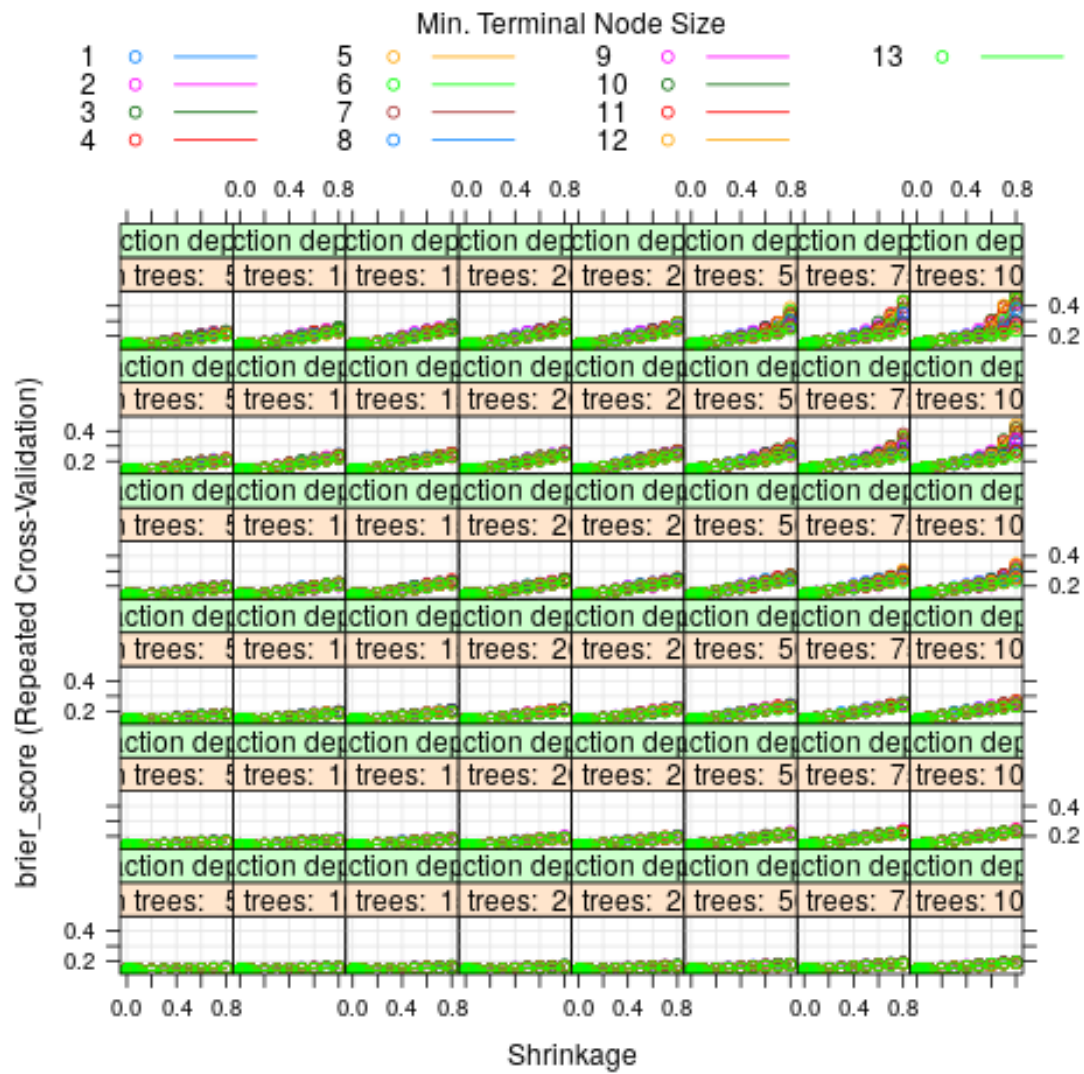

Figure 5: Results of grid search GBM with inclusion of ADI data

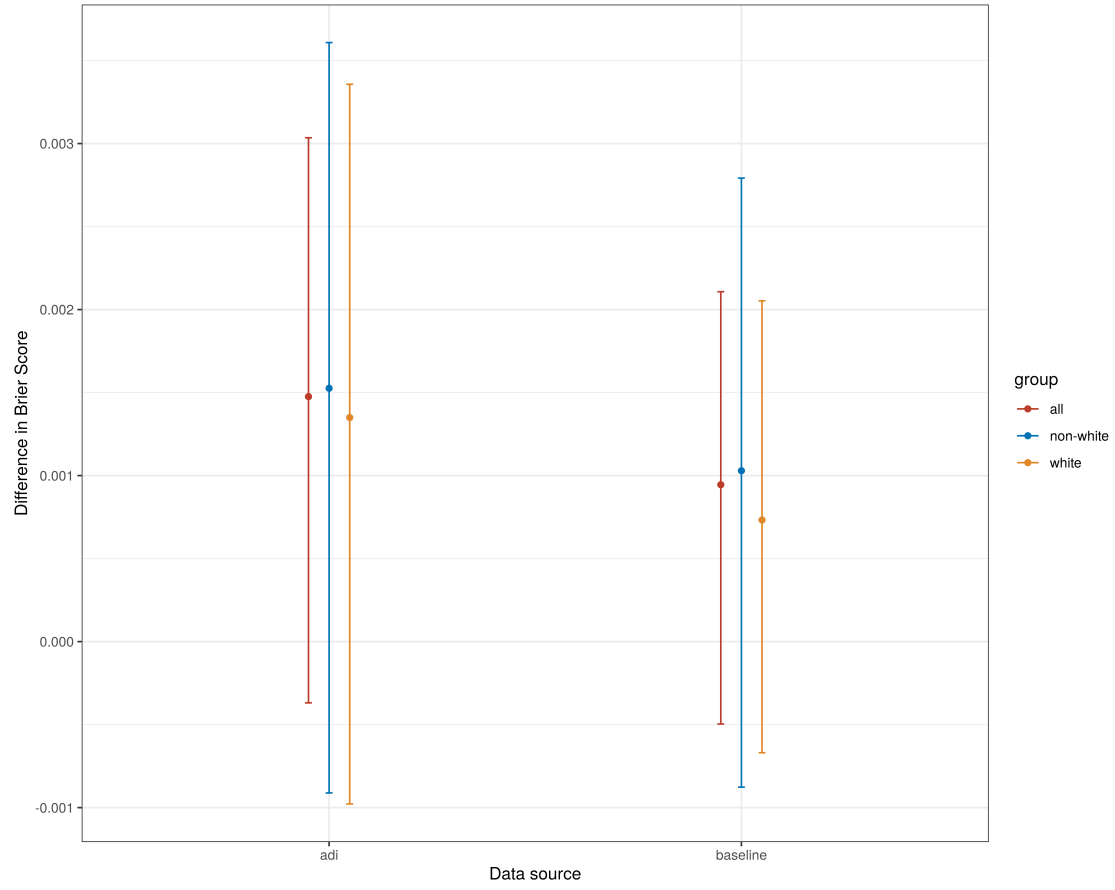

Figure 6: Results of reweighting analysis

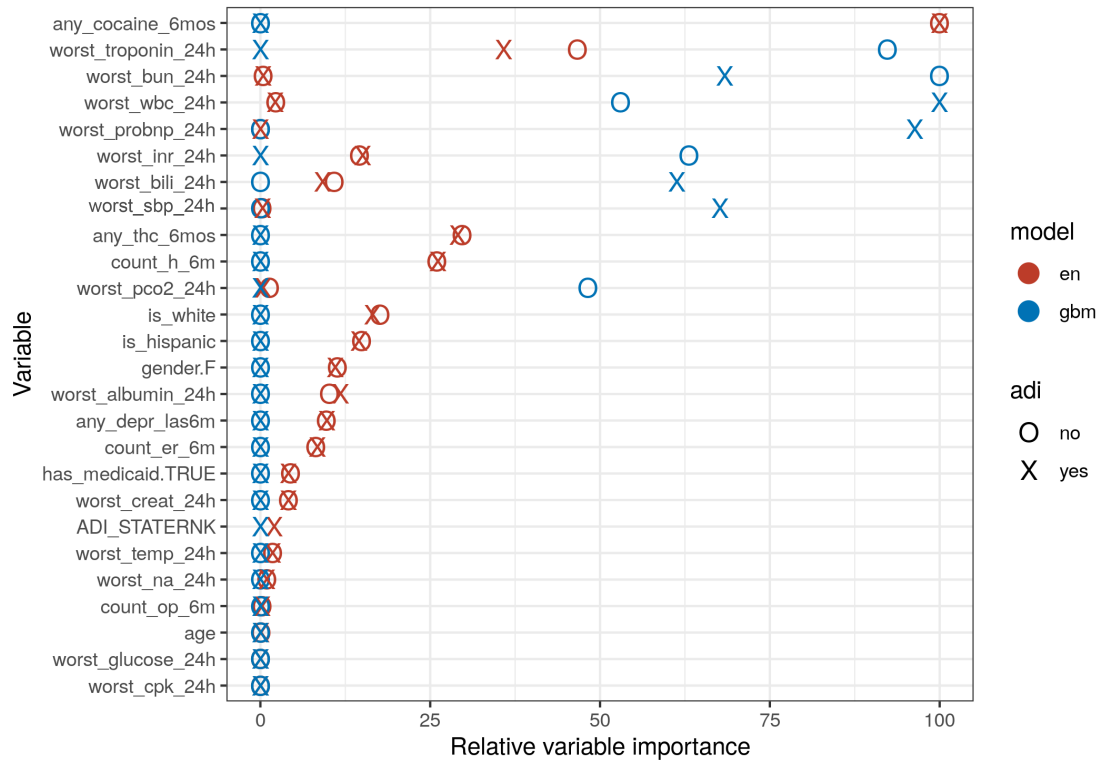

Figure 7: Variable importance by model type and use of the Area Deprivation Index. Multicollinearity between clinical variables such as BUN and creatinine may provide unstable estimates of variable importance for those variables.

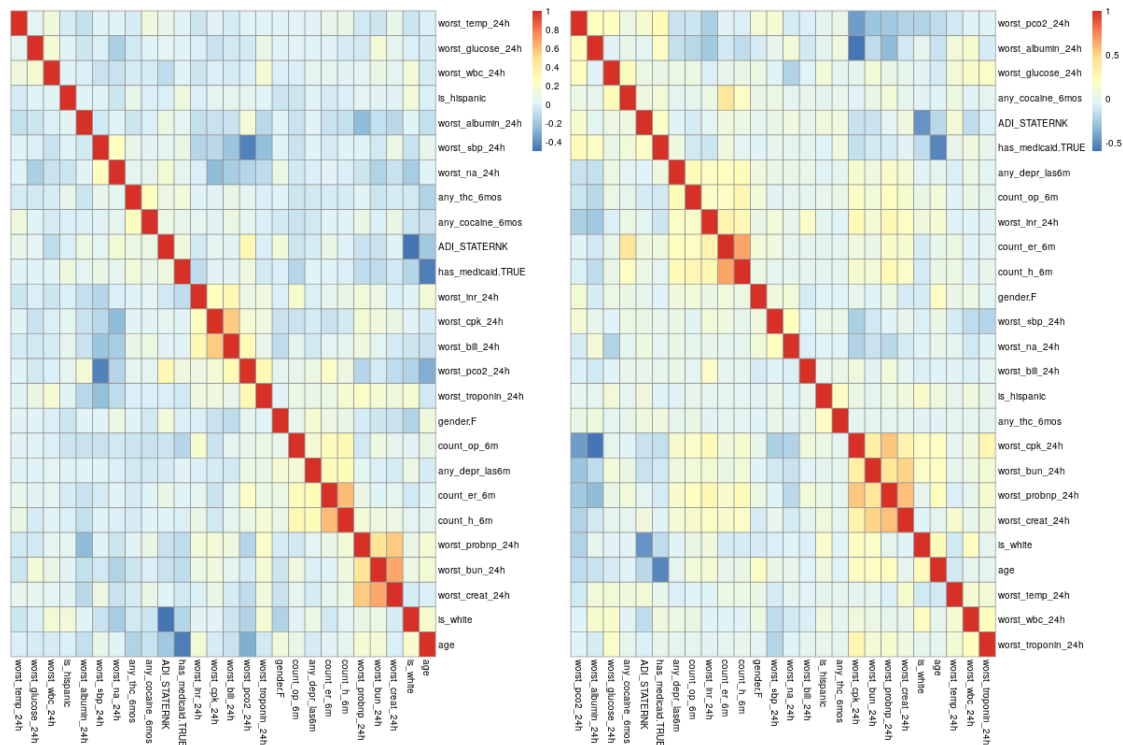

Figure 8: Correlations of predictor variables in the training (left panel) and testing (right panel) sets.

## References

1. Chen IY, Szolovits P, Ghassemi M. Can AI Help Reduce Disparities in General Medical and Mental Health Care? *AMA Journal of Ethics*. 2019 Feb;21(2):167–79.
2. Chen I, Johansson FD, Sontag D. Why Is My Classifier Discriminatory? *arXiv:180512002 [cs, stat] [Internet]*. 2018 May; Available from: <https://arxiv.org/abs/1805.12002>
3. Corbett-Davies S, Goel S. The Measure and Mismeasure of Fairness: A Critical Review of Fair Machine Learning. *arXiv:180800023 [cs] [Internet]*. 2018 Jul; Available from: <https://arxiv.org/abs/1808.00023>
4. Amarasingham R, Moore BJ, Tabak YP, Drazner MH, Clark CA, Zhang S, et al. An automated model to identify heart failure patients at risk for 30-day readmission or death using electronic medical record data. *Medical care*. 2010 Nov;48(11):981–8.
5. Fiest KM, Jette N, Quan H, St. Germaine-Smith C, Metcalfe A, Patten SB, et al. Systematic review and assessment of validated case definitions for depression in administrative data. *BMC Psychiatry*. 2014;14(1):289.
